# Supplementary material for: Ni–Pt nanoparticles growing on metal organic frameworks (MIL-96) with enhanced catalytic activity for hydrogen generation from hydrazine at room temperature
Source: Royal Society of Chemistry journal article supplement (doi:10.1039/c5dt00493d), 2015-01-01
Supplement: c5dt00493d1.pdf [file c5dt00493d1.pdf]

# Ni-Pt nanoparticles growing on metal organic frameworks (MIL-96) with enhanced catalytic activity for hydrogen generation from hydrazine at room temperature

Lan Wen,<sup>a</sup> Xiaoqiong Du,<sup>a</sup> Jun Su,<sup>c</sup> Wei Luo,<sup>\*a,b</sup> Ping Cai<sup>\*a</sup> and Gongzhen Cheng<sup>a</sup>

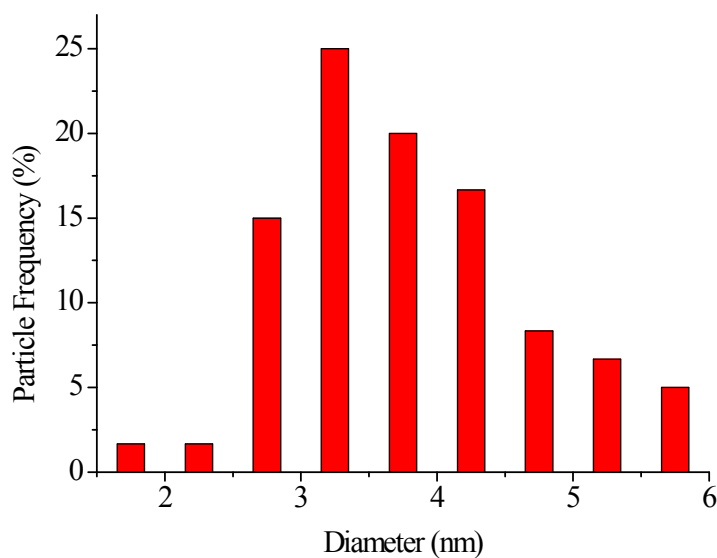

Figure. S1 Ni<sub>64</sub>Pt<sub>36</sub> nanoparticle size distribution histogram of Ni<sub>64</sub>Pt<sub>36</sub>/MIL-96,  
Mean size= 3.2 nm.

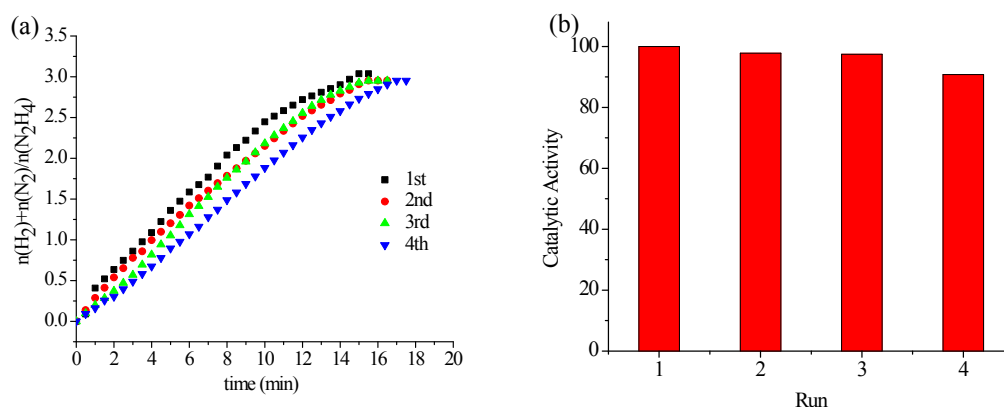

Figure. S2 (a) reusability test of Ni<sub>64</sub>Pt<sub>36</sub>/MIL-96 for decomposition of hydrazine in aqueous NaOH solution (0.5 M) at 25 °C (catalyst = 0.100 g; N<sub>2</sub>H<sub>4</sub>·H<sub>2</sub>O = 0.1 mL). (b) Percentage of initial catalytic activity of Ni<sub>64</sub>Pt<sub>36</sub>/MIL-96 in successive runs after recycling by centrifugal separation.

Table S1 - ICP-AES results of different catalysts.

| Catalyst                                              | Ni <sub>95</sub> Pt <sub>5</sub>  | Ni <sub>81</sub> Pt <sub>19</sub> | Ni <sub>64</sub> Pt <sub>36</sub> | Ni <sub>42</sub> Pt <sub>58</sub> | Ni <sub>15</sub> Pt <sub>85</sub> |
|-------------------------------------------------------|-----------------------------------|-----------------------------------|-----------------------------------|-----------------------------------|-----------------------------------|
| Ni-Pt initial composition for preparation of catalyst | Ni <sub>90</sub> Pt <sub>10</sub> | Ni <sub>70</sub> Pt <sub>30</sub> | Ni <sub>50</sub> Pt <sub>50</sub> | Ni <sub>30</sub> Pt <sub>70</sub> | Ni <sub>10</sub> Pt <sub>90</sub> |
| Ni (wt%)                                              | 7.5                               | 5.9                               | 4                                 | 1.8                               | 0.8                               |
| Pt (wt%)                                              | 1.4                               | 4.6                               | 7.3                               | 8.6                               | 14.9                              |

---

Table S2 - Pore volume and surface area of MIL-96 and Ni<sub>64</sub>Pt<sub>36</sub>/MIL-96

---

| Sample                                    | wt%  | Surface Area(m <sup>2</sup> /g) | Pore volume(cm <sup>3</sup> /g) |
|-------------------------------------------|------|---------------------------------|---------------------------------|
| MIL-96                                    | —    | 263                             | 0.182                           |
| Ni <sub>64</sub> Pt <sub>36</sub> /MIL-96 | 11.3 | 153                             | 0.096                           |

---
